# Supplementary material
Source: PubMed Central journal article supplement (PMC7612255)

**Supplementary Figure 1: Uncropped images of immunoblots shown in this study.**

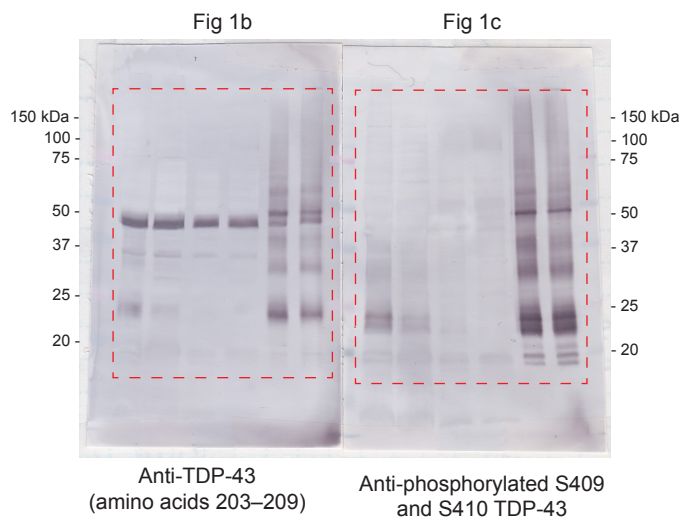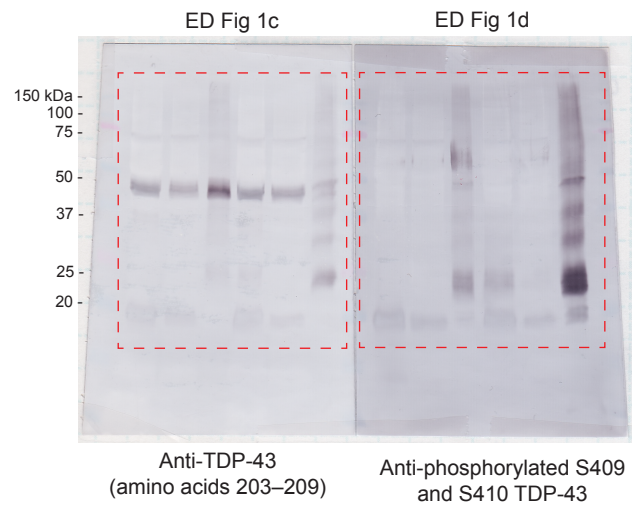

Supplement: EMS140820-supplement-Supp_Fig_1.pdf [file EMS140820-supplement-Supp_Fig_1.pdf]
